# Supplementary material
Source: publisher site journal article supplement (https://www.spandidos-publications.com/2189/downloadSupplementary)

Figure S1. Transfection efficiency of oligonucleotides and plasmids in A549 cells. (A) Transfection efficiency of CASC2-overexpression plasmid and siRNA with their matched negative controls in A549 cells, as determined by RT-qPCR. (B) RT-qPCR was performed to analyze the transfection efficiency of miR-27b mimic (miR-27b) and miR-27b inhibitor (anti-miR-27b) along with their corresponding controls in A549 cells. (C) The knockdown efficiency of si-TAB2 in A549 cells was assessed by RT-qPCR. \* $P < 0.05$ . CASC2, cancer susceptibility candidate 2; TAB2, TGF- $\beta$  activated kinase 1 and MAP3K7-binding protein 2; miR, microRNA; siRNA, small interfering RNA; RT-qPCR, reverse transcription-quantitative PCR; con, control.

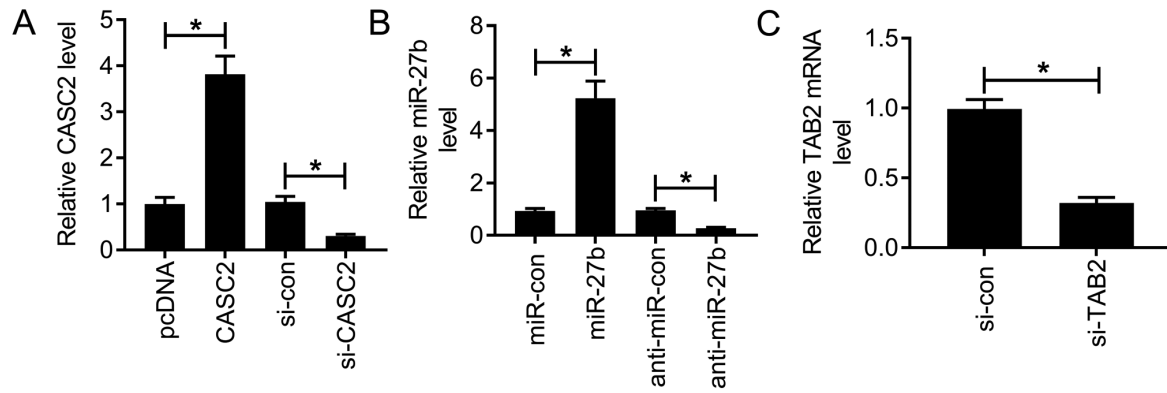

Supplement: Supplementary file 1 [file downloadSupplementary]
